# Supplementary material for: Improved thermoelectric performance of Co-doped β-FeSi2by Ni substitution
Source: Royal Society of Chemistry journal article supplement (doi:10.1039/d3ma00153a), 2023-01-01
Supplement: d3ma00153a1.pdf [file d3ma00153a1.pdf]

## Supporting Information

# Improved Thermoelectric Performance of Co-Doped $\beta$ -FeSi<sub>2</sub> by Ni Substitution

*Sopheap Sam*<sup>a</sup>, *Hiroshi Nakatsugawa*<sup>a,\*</sup>, and *Yoichi Okamoto*<sup>b</sup>

<sup>a</sup>Yokohama National University, Yokohama 240-8501, Japan.

<sup>b</sup>National Defense Academy, Yokosuka 239-8686, Japan

\* *Corresponding author: nakatsugawa-hiroshi-dx@ynu.ac.jp*

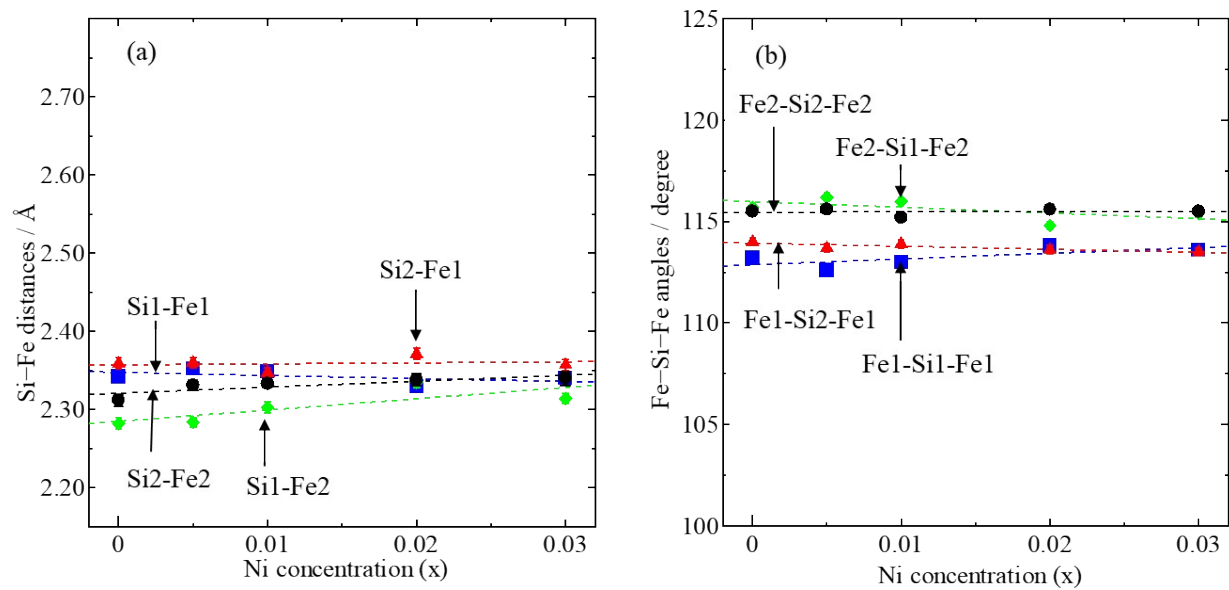

**Figure S1.** (a) Interact atomic Fe-Si distance and (b) interact atomic Fe-Si-Fe angle with x dependence.

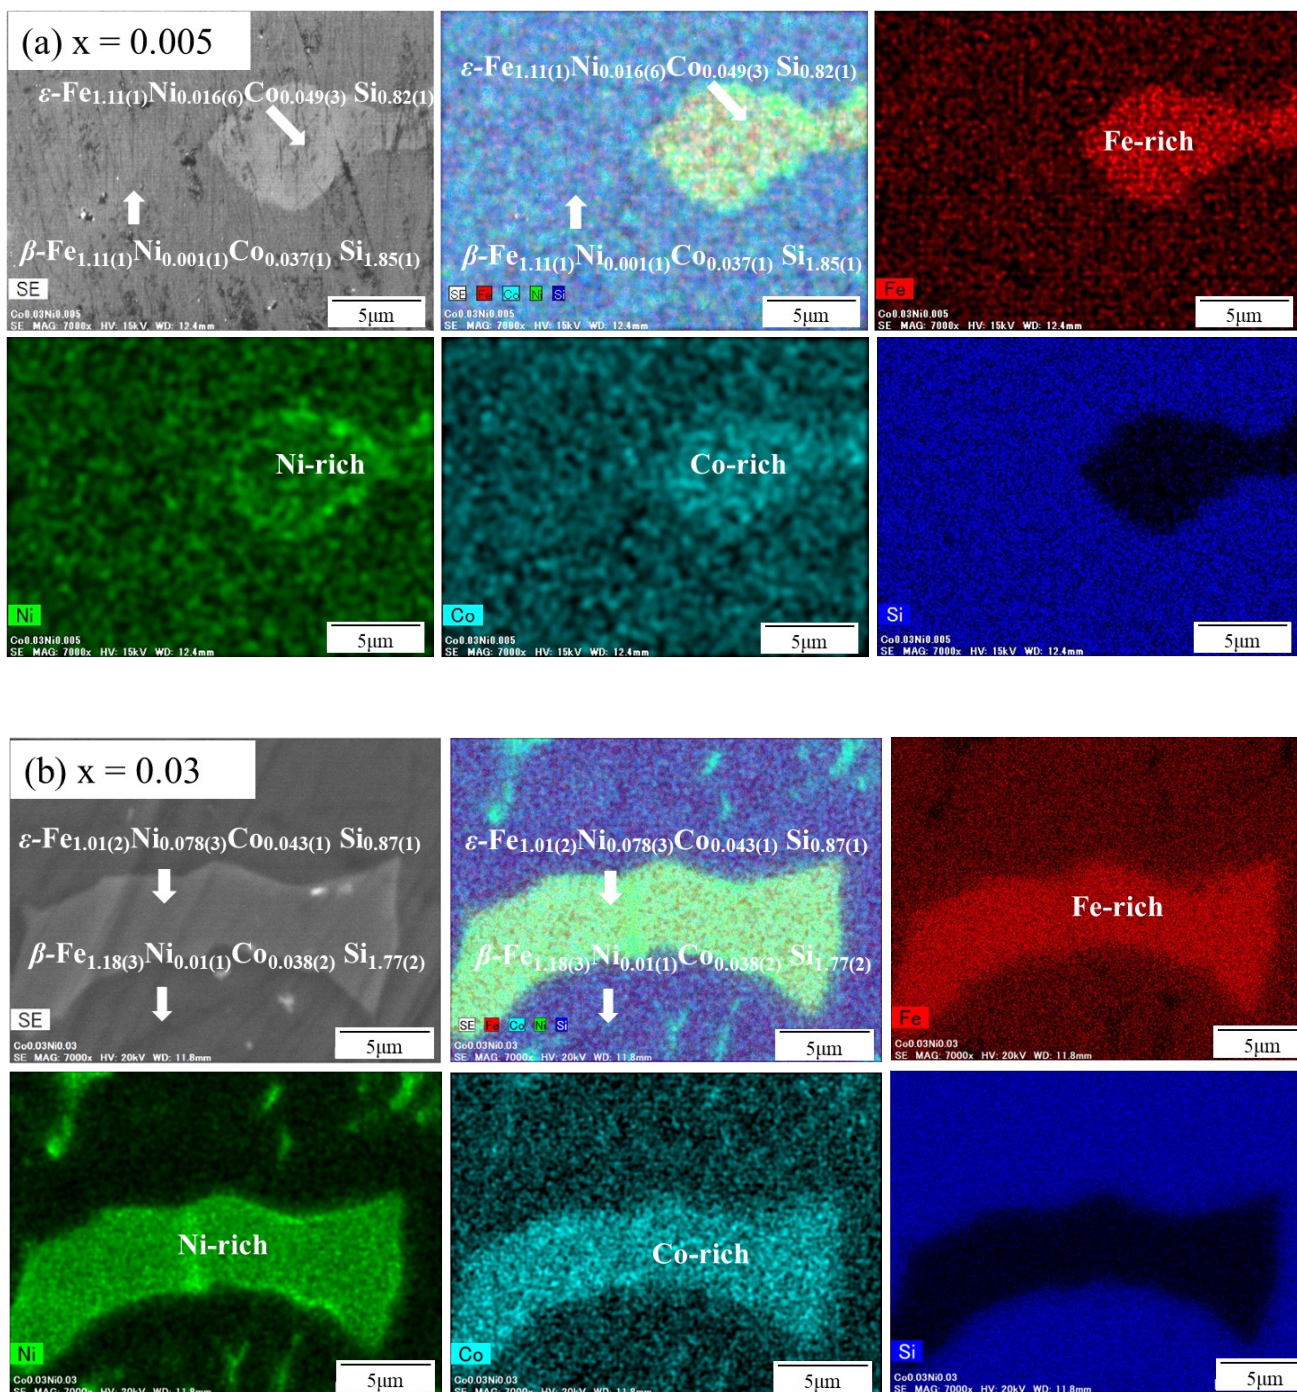

**Figure S2.** SEM-EDS mapping of  $\beta\text{-Fe}_{1-x}\text{Ni}_x\text{Co}_{0.03}\text{Si}_2$ , (a)  $x = 0.005$ , (b)  $x = 0.03$ , after heat treatment with separated mapping of each element, where Fe is mapped in red, Ni in green, Co in cyan, and Si in blue color.

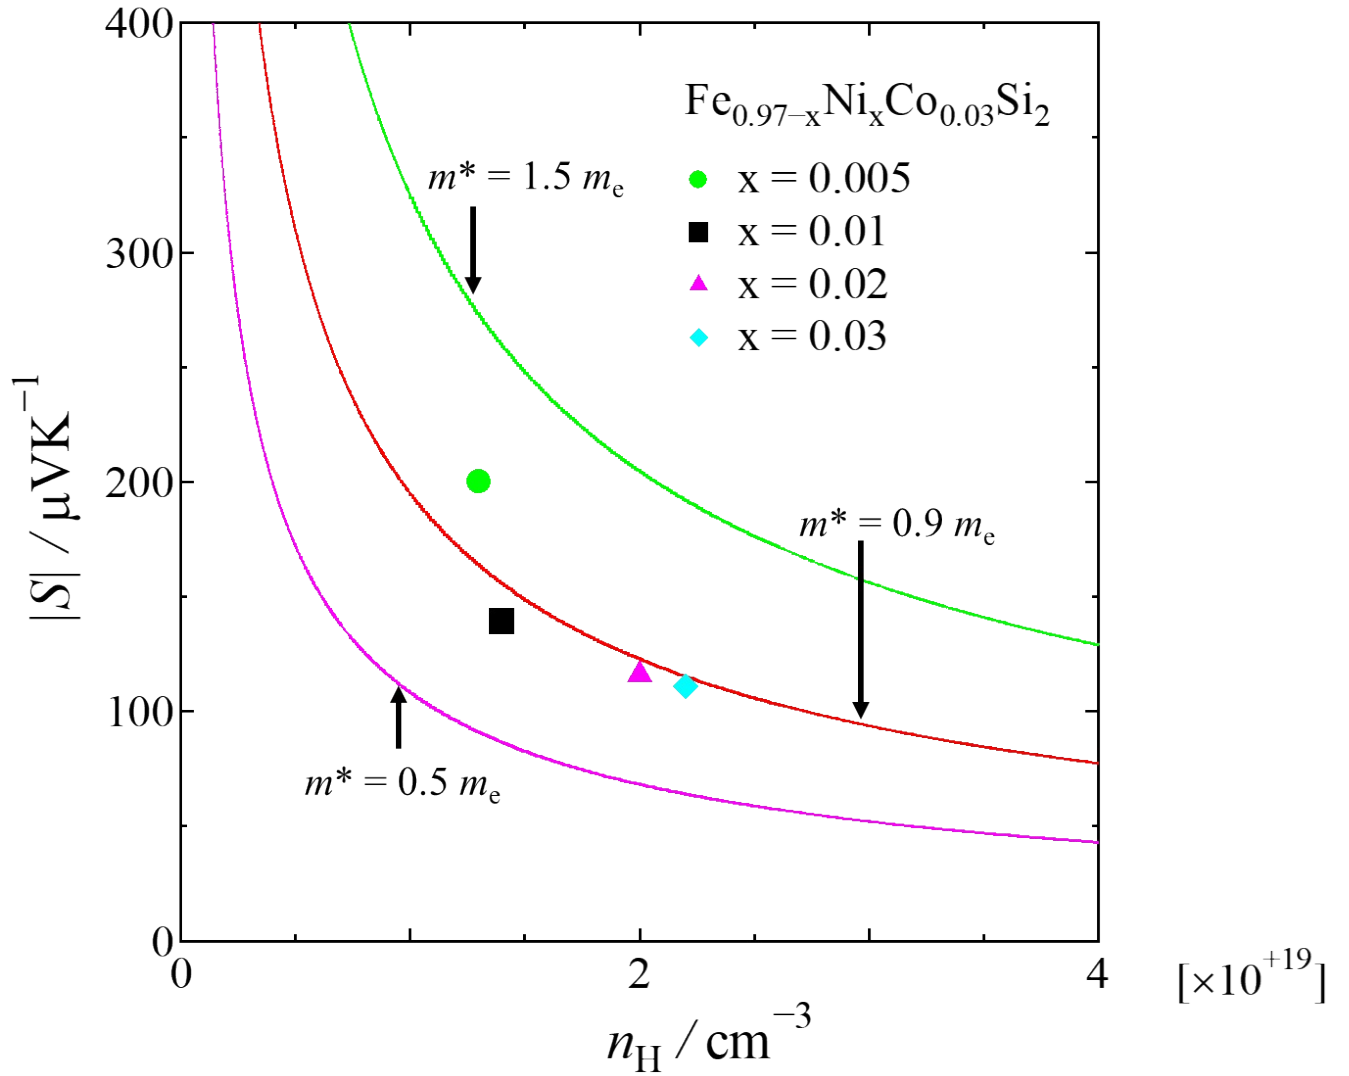

**Figure S3.** Absolute Seebeck coefficient  $|S|$  versus carrier concentration ( $n_{\text{H}}$ ) at room temperature, where the solid curves are the calculated data estimated by using Mott's formula at various effective masses ( $m^* = x m_e$ , where  $x$  is variable and  $m_e$  is the static mass of the electron, i.e.,  $9.10938 \times 10^{-31}$  kg).

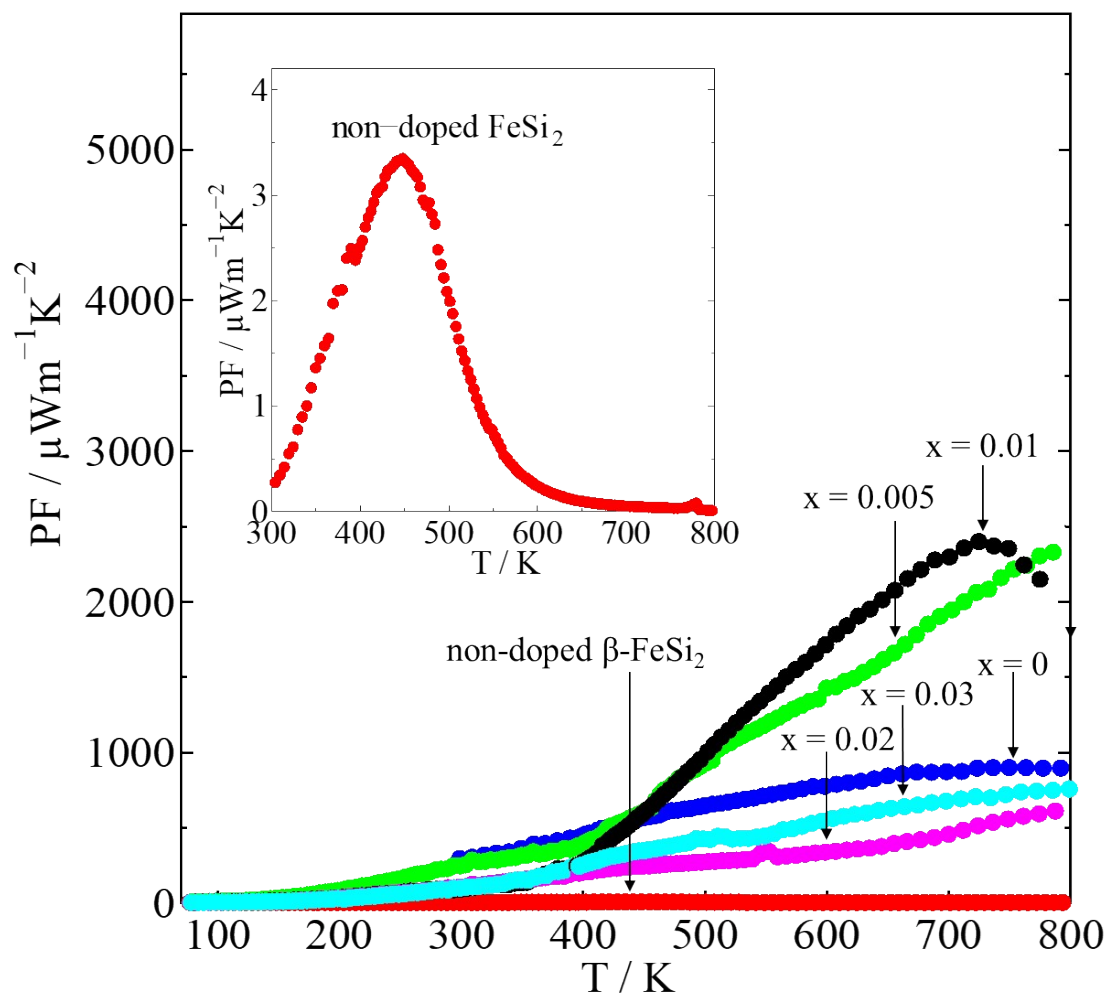

**Figure S4.** Power factor ( $PF = S^2/\rho$ ) of non-doped  $\beta$ -FeSi<sub>2</sub> and  $\beta$ -Fe<sub>0.97-x</sub>Ni<sub>x</sub>Co<sub>0.03</sub>Si<sub>2</sub> ( $0 \leq x \leq 0.03$ ) with temperature dependence, where the inset magnifies the data of non-doped  $\beta$ -FeSi<sub>2</sub>.

**Table S1** Crystal structure parameters of non-doped  $\beta$ -FeSi<sub>2</sub> and  $\beta$ -Fe<sub>0.97-x</sub>Ni<sub>x</sub>Co<sub>0.03</sub>Si<sub>2</sub> ( $0 \leq x \leq 0.03$ ) at room temperature.

| Sample                     |                            | non-doped FeSi <sub>2</sub> | Fe <sub>0.97-x</sub> Ni <sub>x</sub> Co <sub>0.03</sub> Si <sub>2</sub> |             |             |             |             |
|----------------------------|----------------------------|-----------------------------|-------------------------------------------------------------------------|-------------|-------------|-------------|-------------|
|                            |                            |                             | 0                                                                       | 0.005       | 0.01        | 0.02        | 0.03        |
| Space group                |                            | <i>Cmce</i>                 | <i>Cmce</i>                                                             | <i>Cmce</i> | <i>Cmce</i> | <i>Cmce</i> | <i>Cmce</i> |
| <i>a</i> (Å)               |                            | 9.8788(5)                   | 9.8864(6)                                                               | 9.8915(5)   | 9.8929(5)   | 9.8866(9)   | 9.8851(4)   |
| <i>b</i> (Å)               |                            | 7.8008(4)                   | 7.8003(5)                                                               | 7.8015(4)   | 7.8020(4)   | 7.7988(4)   | 7.7965(3)   |
| <i>c</i> (Å)               |                            | 7.8372(4)                   | 7.8344(5)                                                               | 7.8390(4)   | 7.8412(5)   | 7.8348(7)   | 7.8347(4)   |
| <i>V</i> (Å <sup>3</sup> ) |                            | 603.96(5)                   | 604.16(7)                                                               | 604.93(5)   | 605.22(6)   | 604.1(1)    | 603.82(5)   |
| Fe1                        | <i>x</i>                   | 0.2160(2)                   | 0.2168(3)                                                               | 0.2167(3)   | 0.2178(3)   | 0.2171(3)   | 0.2178(4)   |
|                            | <i>y</i>                   | 0                           | 0                                                                       | 0           | 0           | 0           | 0           |
|                            | <i>z</i>                   | 0                           | 0                                                                       | 0           | 0           | 0           | 0           |
|                            | <i>B</i> (Å <sup>2</sup> ) | 0.1                         | 0.1                                                                     | 0.1         | 0.1         | 0.1         | 0.1         |
|                            | <i>g</i>                   | 1.000                       | 0.970                                                                   | 0.965       | 0.960       | 0.950       | 0.940       |
| Co1                        | <i>x</i>                   | -                           | 0.2168(3)                                                               | 0.2167(3)   | 0.2178(3)   | 0.2171(3)   | 0.2178(4)   |
|                            | <i>y</i>                   | -                           | 0                                                                       | 0           | 0           | 0           | 0           |
|                            | <i>z</i>                   | -                           | 0                                                                       | 0           | 0           | 0           | 0           |
|                            | <i>B</i> (Å <sup>2</sup> ) | -                           | 0.1                                                                     | 0.1         | 0.1         | 0.1         | 0.1         |
|                            | <i>g</i>                   | -                           | 0.030                                                                   | 0.030       | 0.030       | 0.030       | 0.030       |
| Ni1                        | <i>x</i>                   | -                           | -                                                                       | 0.2167(3)   | 0.2178(3)   | 0.2171(3)   | 0.2178(4)   |
|                            | <i>y</i>                   | -                           | -                                                                       | 0           | 0           | 0           | 0.000       |
|                            | <i>z</i>                   | -                           | -                                                                       | 0           | 0           | 0           | 0.000       |
|                            | <i>B</i> (Å <sup>2</sup> ) | -                           | -                                                                       | 0.1         | 0.1         | 0.1         | 0.100       |
|                            | <i>g</i>                   | -                           | -                                                                       | 0.005       | 0.010       | 0.020       | 0.030       |
| Fe2                        | <i>x</i>                   | 1/2                         | 1/2                                                                     | 1/2         | 1/2         | 1/2         | 1/2         |
|                            | <i>y</i>                   | 0.3014(4)                   | 0.3017(5)                                                               | 0.3006(4)   | 0.3028(5)   | 0.3033(4)   | 0.3034(5)   |
|                            | <i>z</i>                   | 0.1940(4)                   | 0.1949(4)                                                               | 0.1949(4)   | 0.1948(5)   | 0.1941(4)   | 0.1942(5)   |
|                            | <i>B</i> (Å <sup>2</sup> ) | 0.1                         | 0.1                                                                     | 0.1         | 0.1         | 0.1         | 0.1         |
|                            | <i>g</i>                   | 1.000                       | 0.970                                                                   | 0.965       | 0.960       | 0.950       | 0.940       |
| Co2                        | <i>x</i>                   | -                           | 1/2                                                                     | 1/2         | 1/2         | 1/2         | 1/2         |
|                            | <i>y</i>                   | -                           | 0.3017(5)                                                               | 0.3006(4)   | 0.3028(5)   | 0.3033(4)   | 0.3034(5)   |
|                            | <i>z</i>                   | -                           | 0.1949(4)                                                               | 0.1949(4)   | 0.1948(5)   | 0.1941(4)   | 0.1942(5)   |
|                            | <i>B</i> (Å <sup>2</sup> ) | -                           | 0.1                                                                     | 0.1         | 0.1         | 0.1         | 0.1         |
|                            | <i>g</i>                   | -                           | 0.030                                                                   | 0.030       | 0.030       | 0.030       | 0.030       |
| Ni2                        | <i>x</i>                   | -                           | -                                                                       | 1/2         | 1/2         | 1/2         | 1/2         |
|                            | <i>y</i>                   | -                           | -                                                                       | 0.3006(4)   | 0.3028(5)   | 0.3033(4)   | 0.3034(5)   |
|                            | <i>z</i>                   | -                           | -                                                                       | 0.1949(4)   | 0.1948(5)   | 0.1941(4)   | 0.1942(5)   |
|                            | <i>B</i> (Å <sup>2</sup> ) | -                           | -                                                                       | 0.1         | 0.1         | 0.1         | 0.100       |
|                            | <i>g</i>                   | -                           | -                                                                       | 0.005       | 0.010       | 0.020       | 0.030       |

| Sample                                                    |                            | non-doped FeSi <sub>2</sub> | Fe <sub>0.97-x</sub> Ni <sub>x</sub> Co <sub>0.03</sub> Si <sub>2</sub> |             |             |             |             |
|-----------------------------------------------------------|----------------------------|-----------------------------|-------------------------------------------------------------------------|-------------|-------------|-------------|-------------|
|                                                           |                            |                             | 0                                                                       | 0.005       | 0.01        | 0.02        | 0.03        |
| Space group                                               |                            | <i>Cmce</i>                 | <i>Cmce</i>                                                             | <i>Cmce</i> | <i>Cmce</i> | <i>Cmce</i> | <i>Cmce</i> |
| Si1                                                       | <i>x</i>                   | 0.1217(5)                   | 0.1239(7)                                                               | 0.1226(6)   | 0.1238(7)   | 0.1267(7)   | 0.1255(7)   |
|                                                           | <i>y</i>                   | 0.2811(7)                   | 0.2807(8)                                                               | 0.2809(7)   | 0.2792(8)   | 0.2804(8)   | 0.2788(9)   |
|                                                           | <i>z</i>                   | 0.0394(4)                   | 0.0367(5)                                                               | 0.0382(4)   | 0.0401(5)   | 0.0432(5)   | 0.0412(6)   |
|                                                           | <i>B</i> (Å <sup>2</sup> ) | 0.3                         | 0.3                                                                     | 0.3         | 0.3         | 0.3         | 0.3         |
|                                                           | <i>g</i>                   | 1.0                         | 1.0                                                                     | 1.0         | 1.0         | 1.0         | 1.0         |
| Si2                                                       | <i>x</i>                   | 0.3761(5)                   | 0.3749(7)                                                               | 0.3752(6)   | 0.3742(7)   | 0.3748(7)   | 0.3748(7)   |
|                                                           | <i>y</i>                   | 0.0399(5)                   | 0.0380(6)                                                               | 0.0400(5)   | 0.0413(6)   | 0.0440(6)   | 0.0440(7)   |
|                                                           | <i>z</i>                   | 0.2220(6)                   | 0.2223(8)                                                               | 0.2216(6)   | 0.2213(8)   | 0.2237(7)   | 0.2221(5)   |
|                                                           | <i>B</i> (Å <sup>2</sup> ) | 0.3                         | 0.3                                                                     | 0.3         | 0.3         | 0.3         | 0.3         |
|                                                           | <i>g</i>                   | 1.0                         | 1.0                                                                     | 1.0         | 1.0         | 1.0         | 1.0         |
| <i>R</i> <sub>wp</sub> (%)                                |                            | 3.316                       | 3.474                                                                   | 2.907       | 3.243       | 3.194       | 3.408       |
| <i>R</i> <sub>p</sub> (%)                                 |                            | 2.108                       | 2.309                                                                   | 1.937       | 2.016       | 1.998       | 2.144       |
| <i>R</i> <sub>R</sub> (%)                                 |                            | 29.041                      | 34.348                                                                  | 30.814      | 32.950      | 31.802      | 34.86       |
| <i>R</i> <sub>c</sub> (%)                                 |                            | 0.792                       | 0.784                                                                   | 1.453       | 1.475       | 0.803       | 0.799       |
| <i>R</i> <sub>B</sub> (%)                                 |                            | 8.543                       | 10.058                                                                  | 8.408       | 10.119      | 9.56        | 11.498      |
| <i>R</i> <sub>F</sub> (%)                                 |                            | 8.603                       | 8.977                                                                   | 7.901       | 7.361       | 7.609       | 9.43        |
| <i>S</i> = <i>R</i> <sub>wp</sub> / <i>R</i> <sub>c</sub> |                            | 4.187                       | 4.431                                                                   | 2.001       | 2.199       | 3.978       | 4.265       |
| Si1 - Fe1 / Co1/Ni1 (Å)                                   |                            | 2.361(5)                    | 2.342(6)                                                                | 2.352(6)    | 2.349(7)    | 2.329(6)    | 2.340(7)    |
| Si1 - Fe1 / Co1/Ni1 (Å)                                   |                            | 2.402(6)                    | 2.392(7)                                                                | 2.399(6)    | 2.389(7)    | 2.386(7)    | 2.379(8)    |
| Si1 - Fe2 / Co2/Ni2 (Å)                                   |                            | 2.282(5)                    | 2.282(7)                                                                | 2.284(6)    | 2.303(7)    | 2.335(7)    | 2.314(7)    |
| Si1 - Fe2 / Co2/Ni2 (Å)                                   |                            | 2.415(4)                    | 2.438(5)                                                                | 2.422(5)    | 2.419(6)    | 2.416(6)    | 2.423(6)    |
| Fe1 / Co1/Ni1 - Si1 - Fe1 / Co1/Ni1 (deg.)                |                            | 112.3(2)                    | 113.2(3)                                                                | 112.6(2)    | 113.0(2)    | 113.8(3)    | 113.6(3)    |
| Fe2 / Co2/Ni2 - Si1 - Fe2 / Co2/Ni2 (deg.)                |                            | 116.6(2)                    | 115.7(2)                                                                | 116.2(2)    | 116.0(2)    | 114.8(2)    | 115.4(2)    |
| Si2 - Fe1 / Co1/Ni1 (Å)                                   |                            | 2.372(5)                    | 2.359(7)                                                                | 2.360(6)    | 2.347(7)    | 2.371(7)    | 2.357(7)    |
| Si2 - Fe1 / Co1/Ni1 (Å)                                   |                            | 2.381(5)                    | 2.375(6)                                                                | 2.384(5)    | 2.389(6)    | 2.372(6)    | 2.387(7)    |
| Si2 - Fe2 / Co2/Ni2 (Å)                                   |                            | 2.322(6)                    | 2.312(8)                                                                | 2.331(7)    | 2.333(3)    | 2.338(8)    | 2.340(9)    |
| Si2 - Fe2 / Co2/Ni2 (Å)                                   |                            | 2.388(5)                    | 2.409(6)                                                                | 2.387(5)    | 2.398(6)    | 2.381(6)    | 2.380(7)    |
| Fe1 / Co1/Ni1 - Si2 - Fe1 / Co1/Ni1 (deg.)                |                            | 113.5(2)                    | 114.0(2)                                                                | 113.7(2)    | 113.9(2)    | 113.6(2)    | 113.5(2)    |
| Fe2 / Co2/Ni2 - Si2 - Fe2 / Co2/Ni2 (deg.)                |                            | 116.1(2)                    | 115.5(2)                                                                | 115.6(2)    | 115.2(2)    | 115.6(2)    | 115.5(2)    |

**Table S1** Continued.
